# Supplementary material for: LY2157299 Monohydrate, a TGF-βR1 Inhibitor, Suppresses Tumor Growth and Ascites Development in Ovarian Cancer
Source: PubMed Central journal article supplement (PMC6115954; doi:10.3390/cancers10080260), 2018-08-07
Supplement: cancers-10-00260-s001.pdf [file cancers-10-00260-s001.pdf]

# Supplementary Materials: LY2157299 Monohydrate, a TGF- $\beta$ R1 Inhibitor, Suppresses Tumor Growth and Ascites Development in Ovarian Cancer

Qing Zhang, Xiaonan Hou, Bradley J. Evans, Jamison L. VanBlaricom, Saravut J. Weroha and William A. Cliby

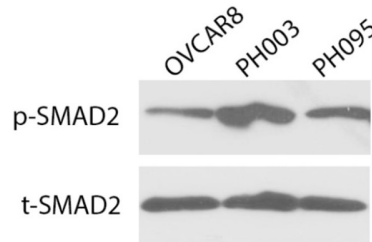

**Figure S1.** Expression of phosphorylated-SMAD2 across animal models. Protein lysates were extracted from untreated OV8-CDX, PH003, and PH095 models and western blot were performed to assess the expression of p-SMAD2. Total SMAD2 was used as loading control.

**Table S1.** PDX models minimal information standard

| Module           | Field                                         | Value (PH003)                   | Value (PH095)                   |
|------------------|-----------------------------------------------|---------------------------------|---------------------------------|
| Clinical/Patient | Patient ID                                    | 3                               | 95                              |
|                  | Gender                                        | Female                          | Female                          |
|                  | Age                                           | 59                              | 65                              |
|                  | Diagnosis                                     | Ovarian Cancer                  | Ovarian Cancer                  |
|                  | Consent to share data                         | Academic centers only           | Academic centers only           |
| Clinical/Tumor   | Tumor ID                                      | PH003                           | PH095                           |
|                  | Primary Tissue of Origin                      | Ovary                           | Ovary                           |
|                  | Collection Site                               | Primary                         | Primary                         |
|                  | Specimen tumor tissue                         | Ovary                           | Ovary                           |
|                  | Histology                                     | Carcinosarcoma                  | Serous                          |
|                  | Grade                                         | High                            | High                            |
|                  | Stage                                         | IIIC                            | IV                              |
|                  | Markers                                       | N/A                             | N/A                             |
|                  | Treatment status                              | Naïve                           | Naïve                           |
|                  | PDX ID                                        | PH003                           | PH095                           |
| Model creation   | Mouse strain                                  | NOD.CB17/Prkdcscid/NCrHsd (NSG) | NOD.CB17/Prkdcscid/NCrHsd (NSG) |
|                  | Strain immune system humanized                | No                              | No                              |
|                  | Tumor preparation                             | Solid tumor                     | Solid tumor                     |
|                  | Injection type and site                       | Intraperitoneal                 | Intraperitoneal                 |
|                  | Tumor characterization technology             | Histology and IHC               | Histology and IHC               |
|                  | Tumor confirmed not to be of mouse/EBV origin | Yes, negative for CD45          | Yes, negative for CD45          |
|                  | Passage QA performed                          | Passage P3                      | Passage P5                      |

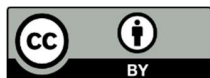

© 2018 by the authors. Licensee MDPI, Basel, Switzerland. This article is an open access article distributed under the terms and conditions of the Creative Commons Attribution (CC BY) license (<http://creativecommons.org/licenses/by/4.0/>).
